# Supplementary material for: Cranial biomechanics of Diplodocus (Dinosauria, Sauropoda): testing hypotheses of feeding behaviour in an extinct megaherbivore
Source: Springer Nature journal article supplement (doi:10.1007/s00114-012-0944-y), 2012-07-11
Supplement: MOESM1 [file 114_2012_944_MOESM1_ESM.docx]

**ONLINE SUPPLEMENTARY MATERIAL FOR:**

**Cranial biomechanics of *Diplodocus* (Dinosauria, Sauropoda): testing hypotheses of feeding behaviour in an extinct megaherbivore**

Mark T. Young1,2§, Emily J. Rayfield1, Casey M. Holliday3, Lawrence M. Witmer4, David J. Button1, Paul Upchurch5 and Paul M. Barrett2,*

1 School of Earth Sciences, University of Bristol, Bristol, BS8 1RJ, UK

2 Department of Palaeontology, The Natural History Museum, London, SW7 5BD, UK

3 Department of Pathology and Anatomical Sciences, University of Missouri, Columbia, MO 65212, USA

4 Department of Biomedical Sciences, Ohio University, Athens, OH 45701, USA

5 Department of Earth Sciences, University College London, London, WC1E 6BT, UK

*Author for correspondence (P.Barrett@nhm.ac.uk)

1) Digital skull reconstruction

2) Model assumptions (material properties, boundary conditions and loading regime)

3) Additional images of the three *Diplodocus* feeding models

4) Exact locations of the 16 nodal stress loci

5) Sensitivity analysis

6) Supplementary references

**1) Digital skull reconstruction**

The three-dimensional model of a complete *Diplodocus longus* skull (Carnegie Museum of Natural History [CM] in Pittsburgh, PA - CM 11161; figure S1) was created using computed tomography scanning. The skull was scanned at the O'Bleness Memorial Hospital (Athens, OH, USA) in 2003 on a General Electric HiSpeed FX/i Helical CT scanner, producing 290 coronal slices, with 512 transaxial slices in both perpendicular planes, separated by 0.2 mm intervals. The fossil bone was digitally extracted from the surrounding rock matrix using the three-dimensional imaging software Amira (v. 4.1.2 Mercury Computing Systems, USA; figure S2A). It was necessary to digitally correct some bones in Amira due to breakage, distortion and other imperfections of the fossil. The vomer of CM 11161 had to be reconstructed; breakages in the palatines, jugals, maxillae, and quadratojugals were corrected; and the distortions to the ectopterygoid maxillary processes were corrected. In addition, a hole in the top of the braincase was closed (in the parietal). Witmer et al. (2008) doubted that this hole is in fact the parietal fontanelle in *Diplodocus*. With the exception of the vomer (which is a small bone exposed on the roof of the adductor chamber), no bones had to be reconstructed. Furthermore, no bones were retro-deformed. Once a 3D model was generated it was compared to cranial material held in the Carnegie Museum and the National Museum of Natural History (Washington, D.C.) to aid reconstruction and improve accuracy.

Once satisfied that the Amira 3D model was as accurate as possible, segmented slice data were imported into ScanIP v. 2.1 Build 149 (Simpleware Ltd, UK). This software produced a smoothed skull surface model. This three-dimensional surface model was then imported into ScanFE v. 2.0 (Simpleware Ltd, UK). In ScanFE the model was meshed using a voxellated approach, creating a solid geometry consisting of approximately 91% tetrahedral and 9% hexahedral elements. The final volumetricmesh had 906, 257 elements. This mesh was then imported into the FE-software Abaqus (v. 6.7 Simulia, USA) (figure S2B).

**Figure S1. Skull used to create the *Diplodocus longus* skull FE-model. A) lateral view of CM 11161, and B) a close-up on the premaxillary dentition, note the unusual oblique wear facets on the labial surface.**


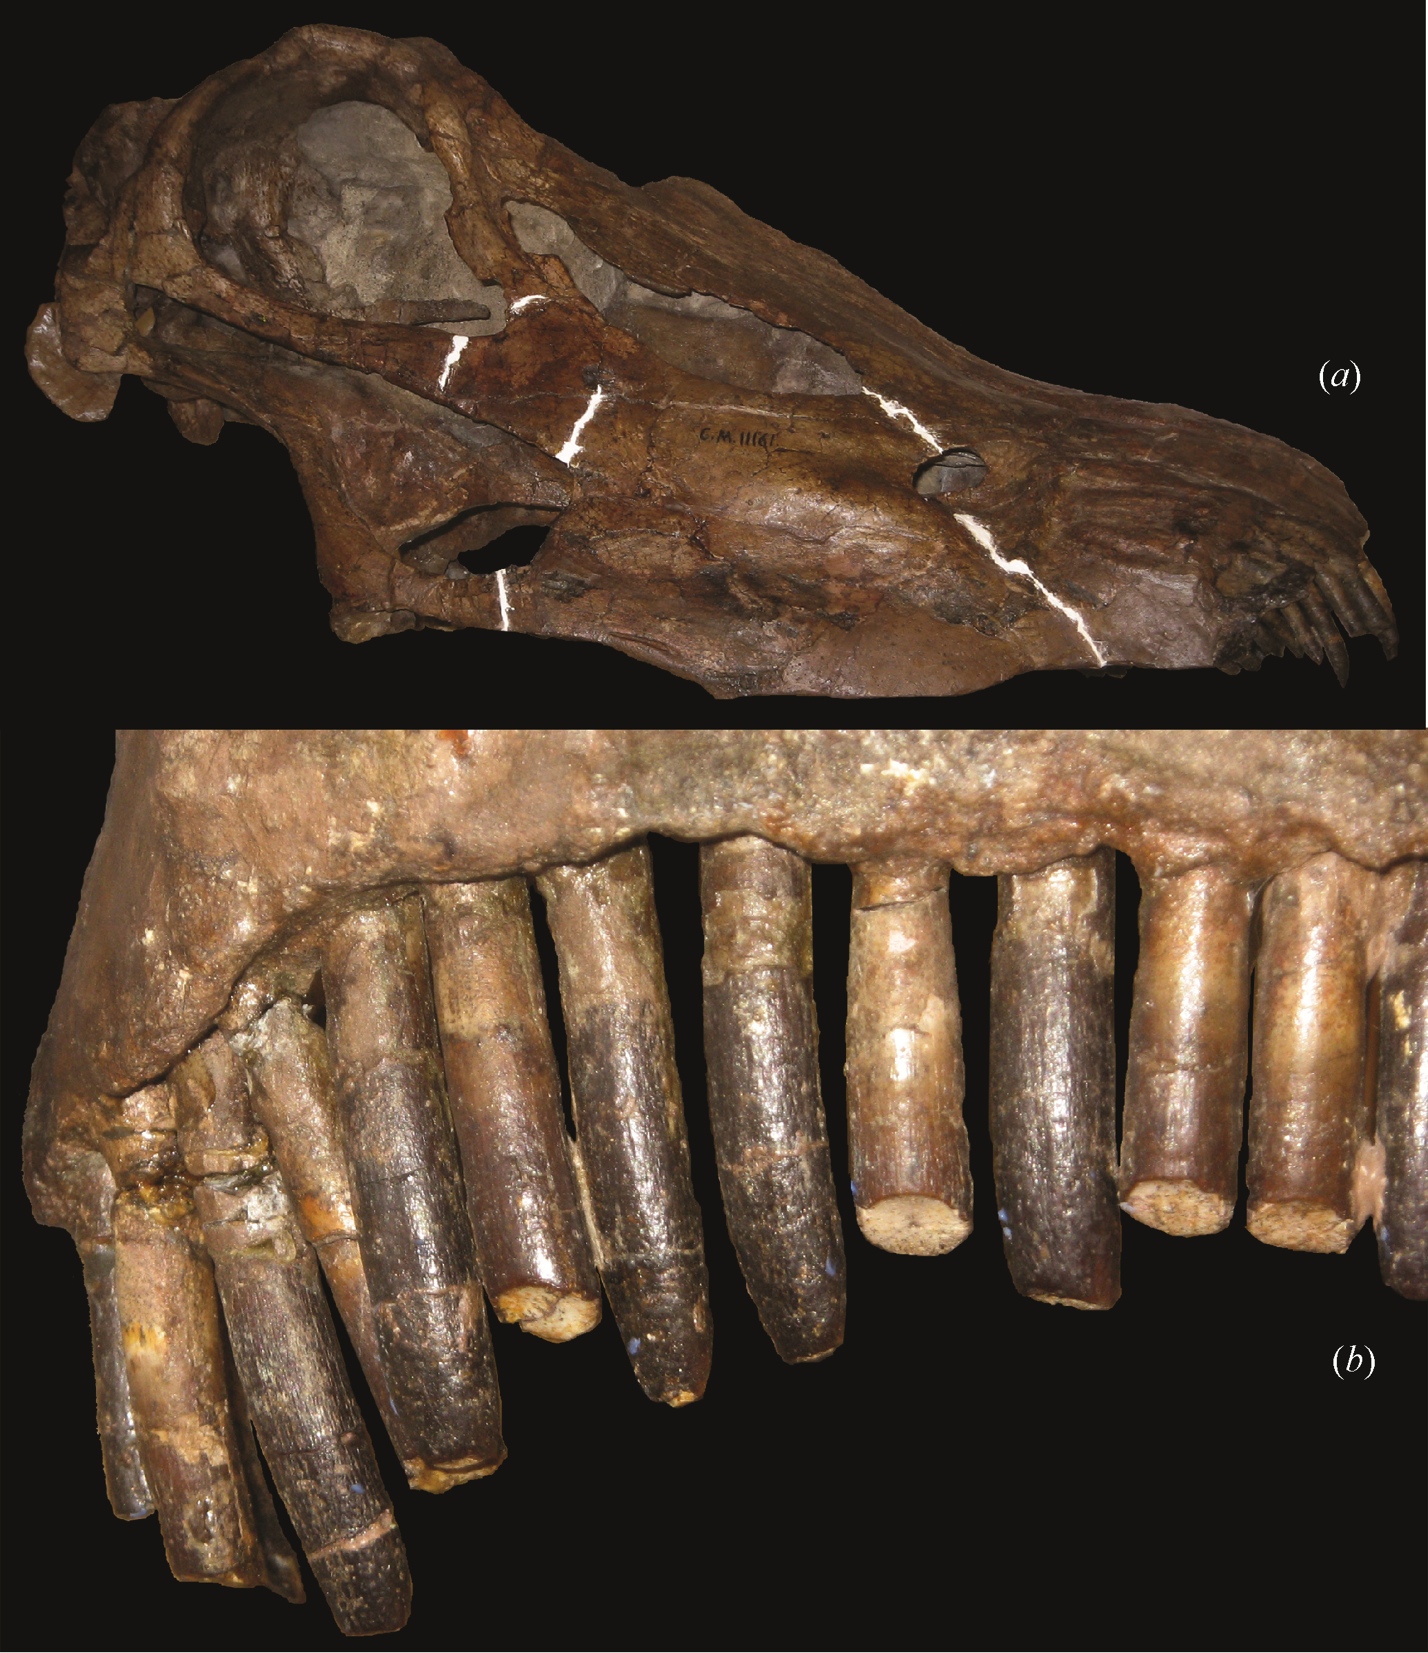


**Figure S2. Creation of the *Diplodocus longus* skull FE-model. A) three-dimensional model created from the CT scan slices in the imaging software Amira and B) the final three-dimensional FE-mesh in the FE-software Abaqus.**


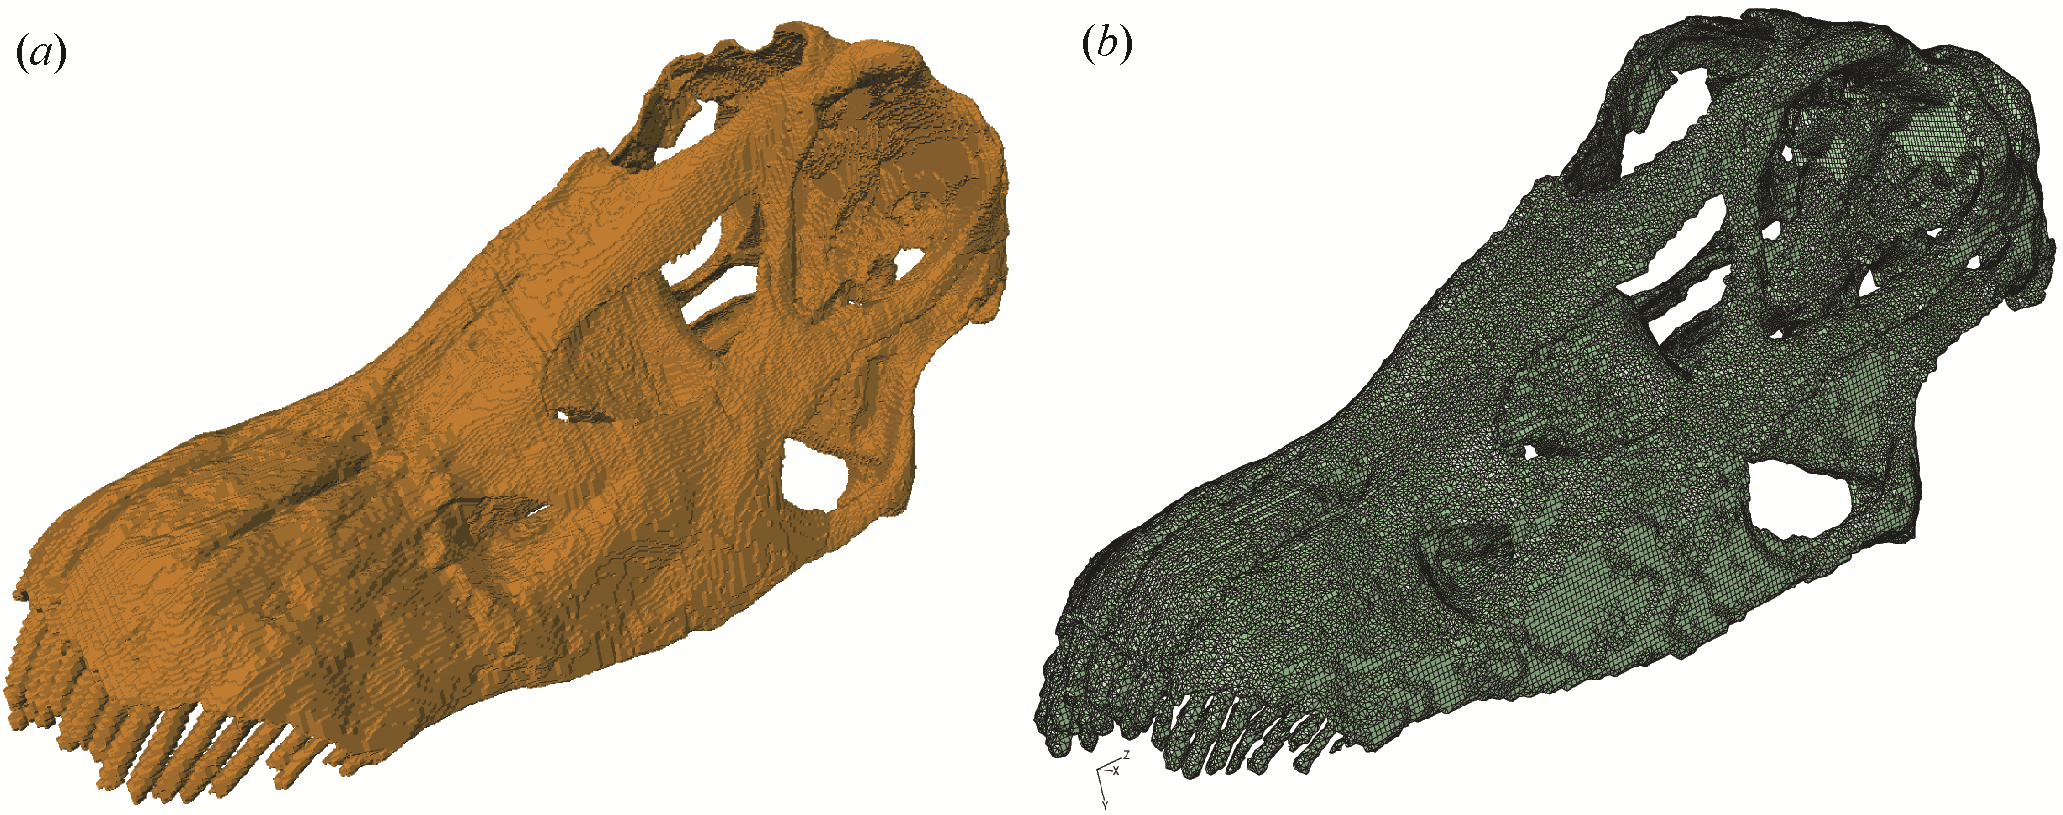


**2) Model assumptions (material properties, boundary conditions and loading regime)**

**Material properties**

Material properties and boundary conditions were assigned to the mesh using the FE-software Abaqus (v. 6.7 Simulia, USA). Although the exact material properties cannot be modelled with true accuracy (Richmond et al., 2005), FE-studies on extinct taxa are also hindered by the inability to directly measure material properties from fossil bone (Rayfield, 2007). As adult Late Jurassic neosauropods (such as *Diplodocus*) are characterised by Haversian bone (Curry, 1999), material properties of extant histological analogues were used as a proxy. Three tissue types were modelled: cranial bone, dentine and enamel, all of which were treated as homogenous and isotropic materials. Although cranial bone is known to be anisotropic (e.g., Zapata et al., 2010), whereas enamel can be isotropic or anisotropic (e.g., see Spears et al., 1993), there is currently no quantitative method to reliably assign anisotropic material properties to long extinct taxa. The method (i.e., see Wroe et al. 2007) for creating heterogeneous models with multiple material properties using CT density values could not be used. This is because CM 11161 has mineralised deposits, such as calcite, that alter the X-ray attenuation data along the CT slice series. Nevertheless, patterns of strain in anisotropic and isotropic FE models are comparable (e.g. Strait et al., 2005), so isotropic models do allow some useful inferences to be made between comparable models or, in the case of this analysis, different loading scenarios applied to the same model. The material properties of tissues in the cranium are poorly known in birds, which constitute one branch of the extant phylogenetic bracket of sauropod dinosaurs (crocodylians and birds). Cranial material property data is known for alligator (Zapata et al., 2010), but following convention we apply material property data based on bovine Haversian bone, which, found in fast growing taxa, may be more appropriate for sauropod dinosaurs. Poisson’s ratio value was based upon the transverse axis rather than the longitudinal axis of vertebrate long bones (Reilly & Burstein, 1975). The lowest value (0.29) was taken so not to overestimate cranial strength. A Young’s modulus of 23.1 GPa (gigapascals) was based upon Haversian bone in bovine femora (Reilly & Burstein, 1975). The material properties applied to dentine were: Young’s modulus = 21 GPa and Poisson’s ratio = 0.31 (Gilmore et al., 1969), while for enamel: Young’s modulus = 80 GPa and Poisson’s ratio = 0.3 (Ichim et al., 2007).

**Model constraints**

The boundary conditions were also assigned to the mesh using the FE-software Abaqus (v. 6.7 Simulia, USA). Again, the exact constraints cannot be modelled with true accuracy (Richmond *et al*., 2005); especially as *Diplodocus longus* is a fossil taxon with no extant analogue and has an extreme craniofacial phenotype. To ensure the constraints were as biologically realistic as possible, a distributing coupling constraint (DCC) was applied (in Abaqus v. 6.7). This type of constraint was chosen as it minimises artificially high stresses in a region that is directly constrained from movement, thus producing a more realistic distribution of cranial stress. The DCC was applied to both the teeth and the jaw joints (figure S3).

**Figure S3. Finite-element model of the *Diplodocus longus* skull showing the distributing coupling constraints on: a) jaw joints and b) the premaxillary teeth, in Abaqus.**


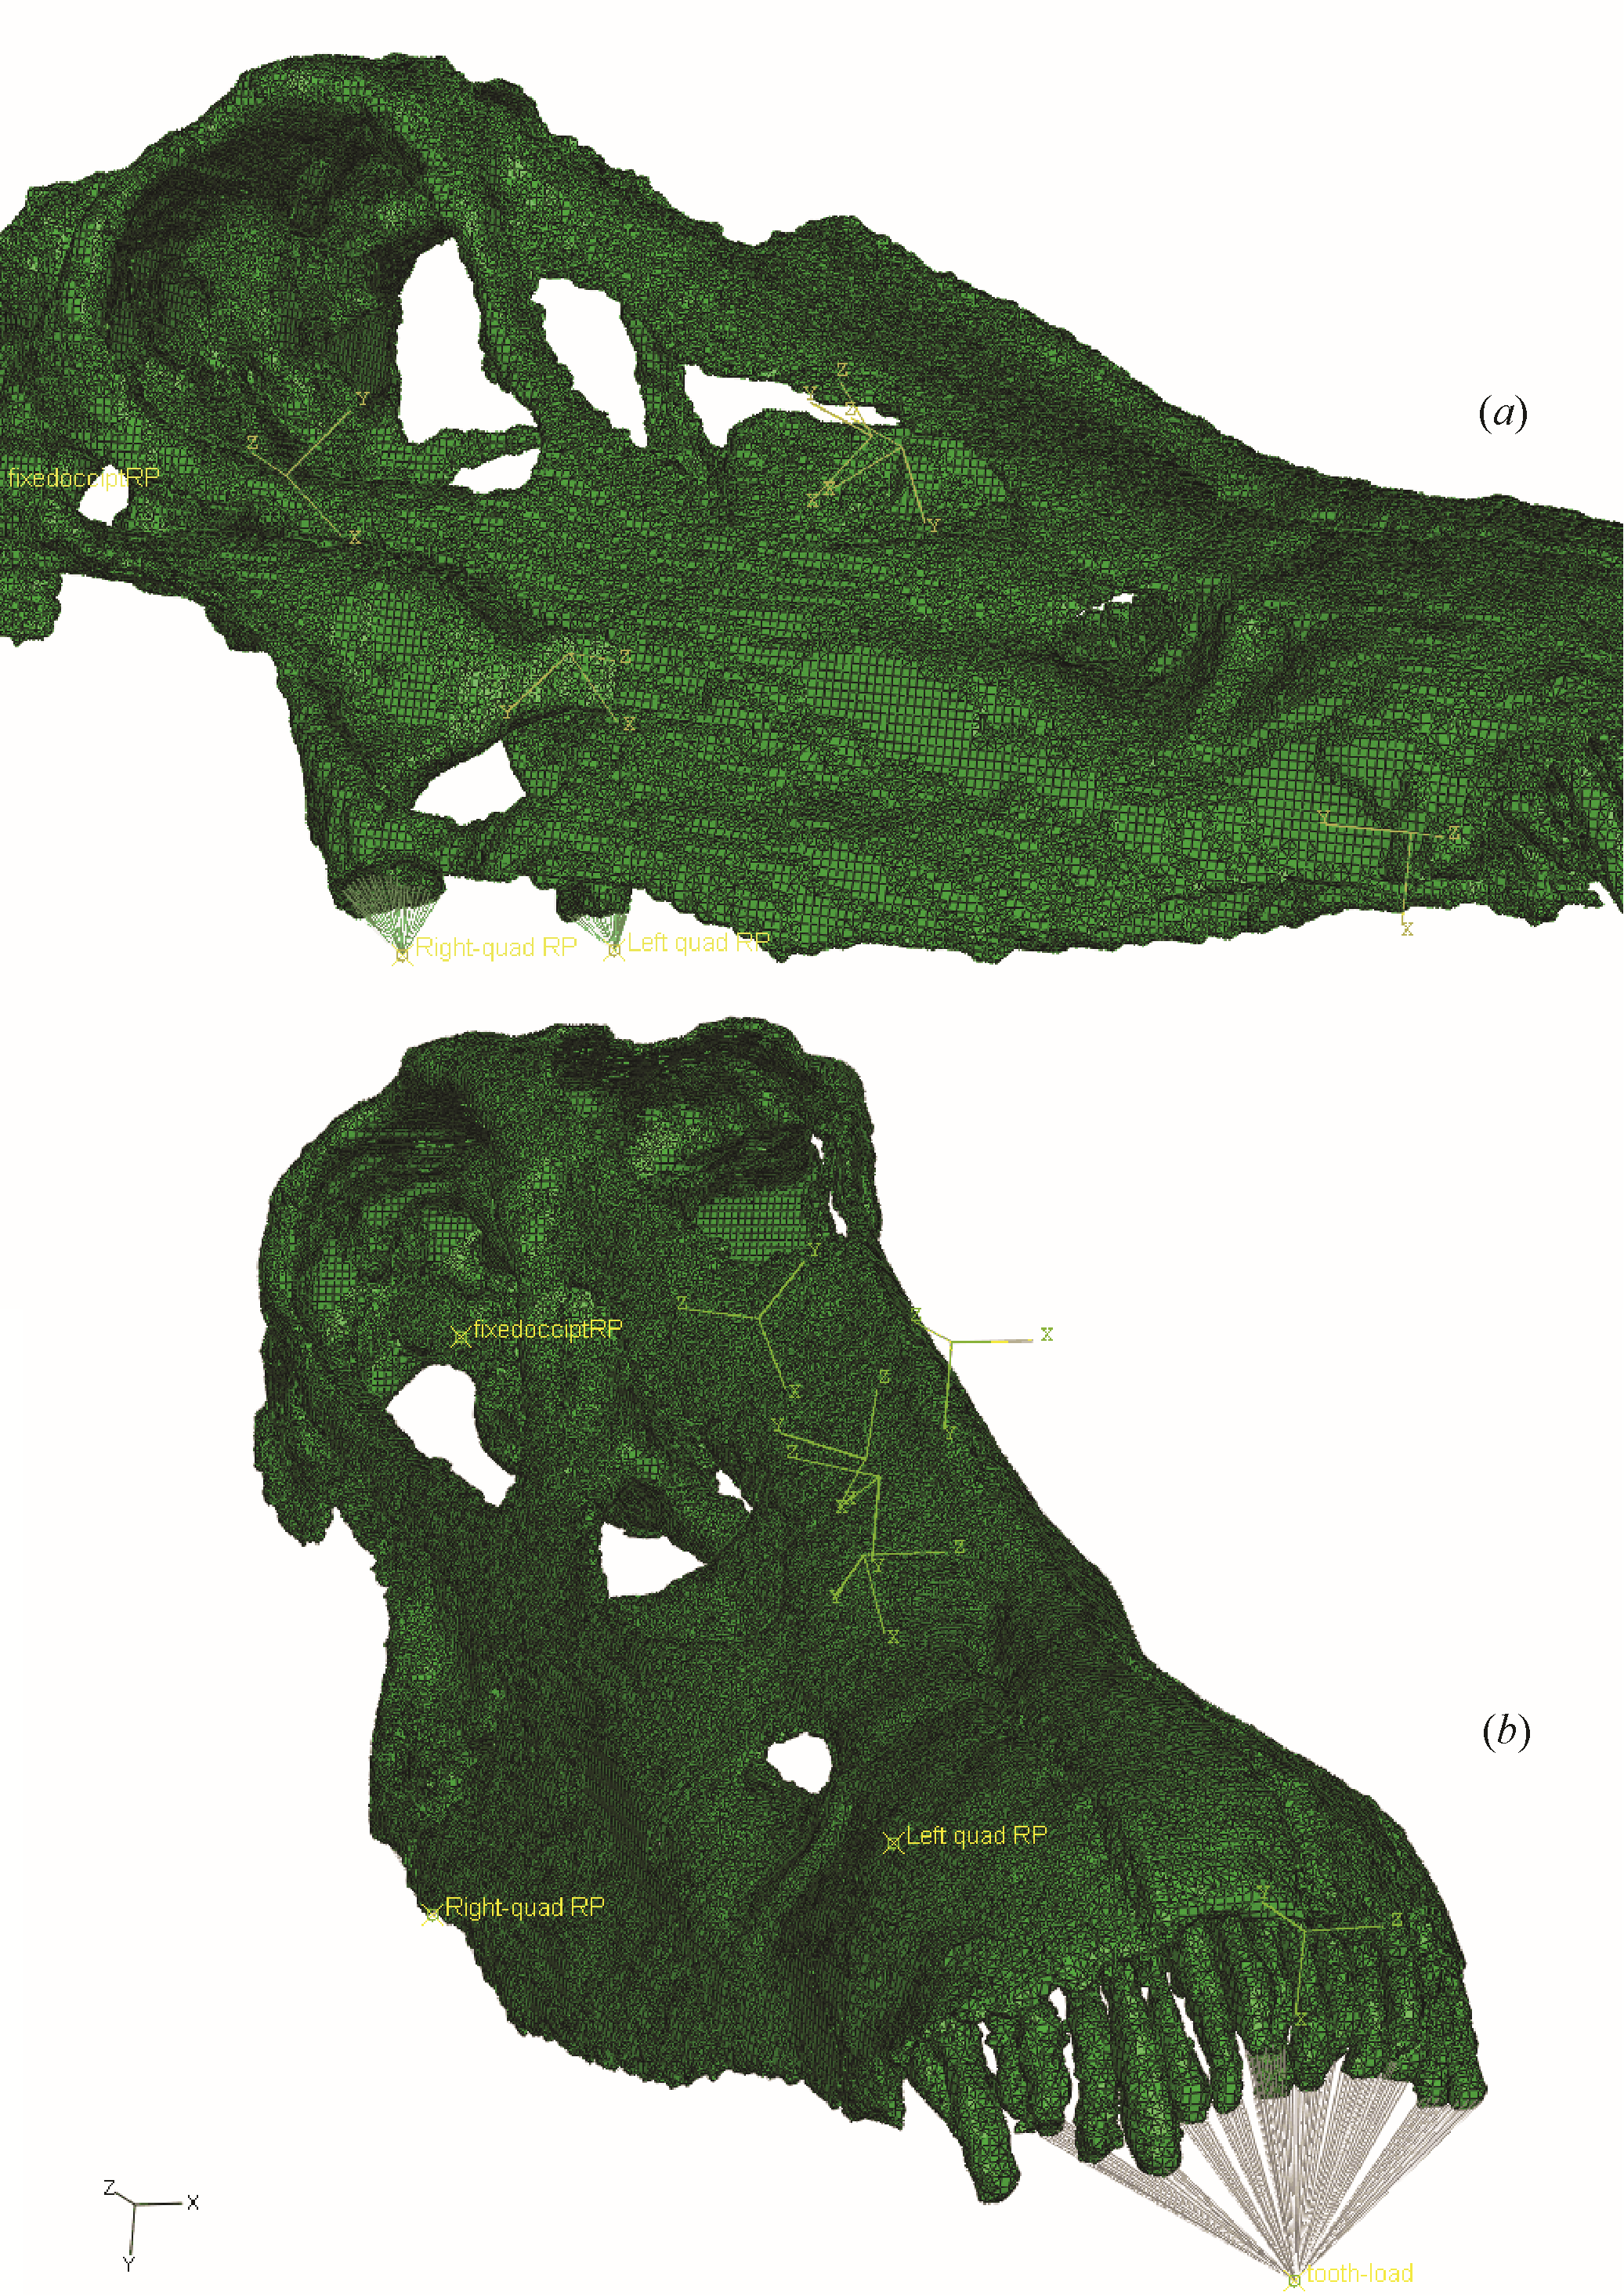


**Figure S4. Orientations of forces applied to the skull during static-biting and bark-stripping. Tooth loads are applied parallel to the tooth long axes. Directions of muscle form show by small arrows.**


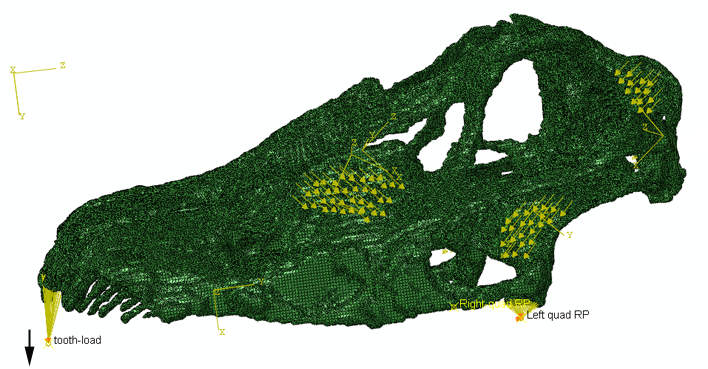


**Figure S5. Orientations of forces applied to the skull during branch-stripping. Tooth loads are applied perpendicular to the tooth long axes. Directions of muscle form show by small arrows.**


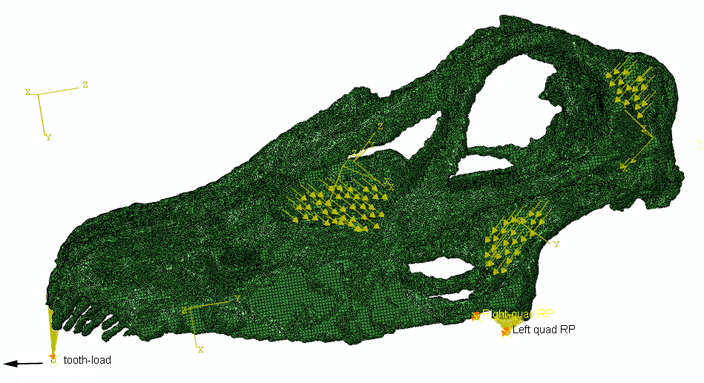


**Muscle reconstruction and force generation**

**Figure S6. Major features of the adductor chamber of *Diplodocus longus* in left lateral aspect. Image is a composite based on CT data (of CM 11161) for skeletal anatomy, while the reconstructed soft-tissue anatomy is based upon osteological correlates. A) superficial dissection, B) adductor chamber musculature origination and insertion sites at superficial depth, C) intermediate depth, D) adductor chamber musculature origination and insertion sites at intermediate depth. Abbreviations: *M. adductor mandibulae externus superficialis*, mAMES; *M. adductor mandibulae externus profundus*, mAMEP; *M. adductor mandibulae posterior*, mAMP; *M. depressor mandibulae*, mDM; *M. pterygoideus dorsalis*, mPTd; *M. protractor pterygoideus*, mPPT; *M. pterygoideus ventralis*, mPTv; *M. pseudotemporalis superficialis*, mPSTs.**


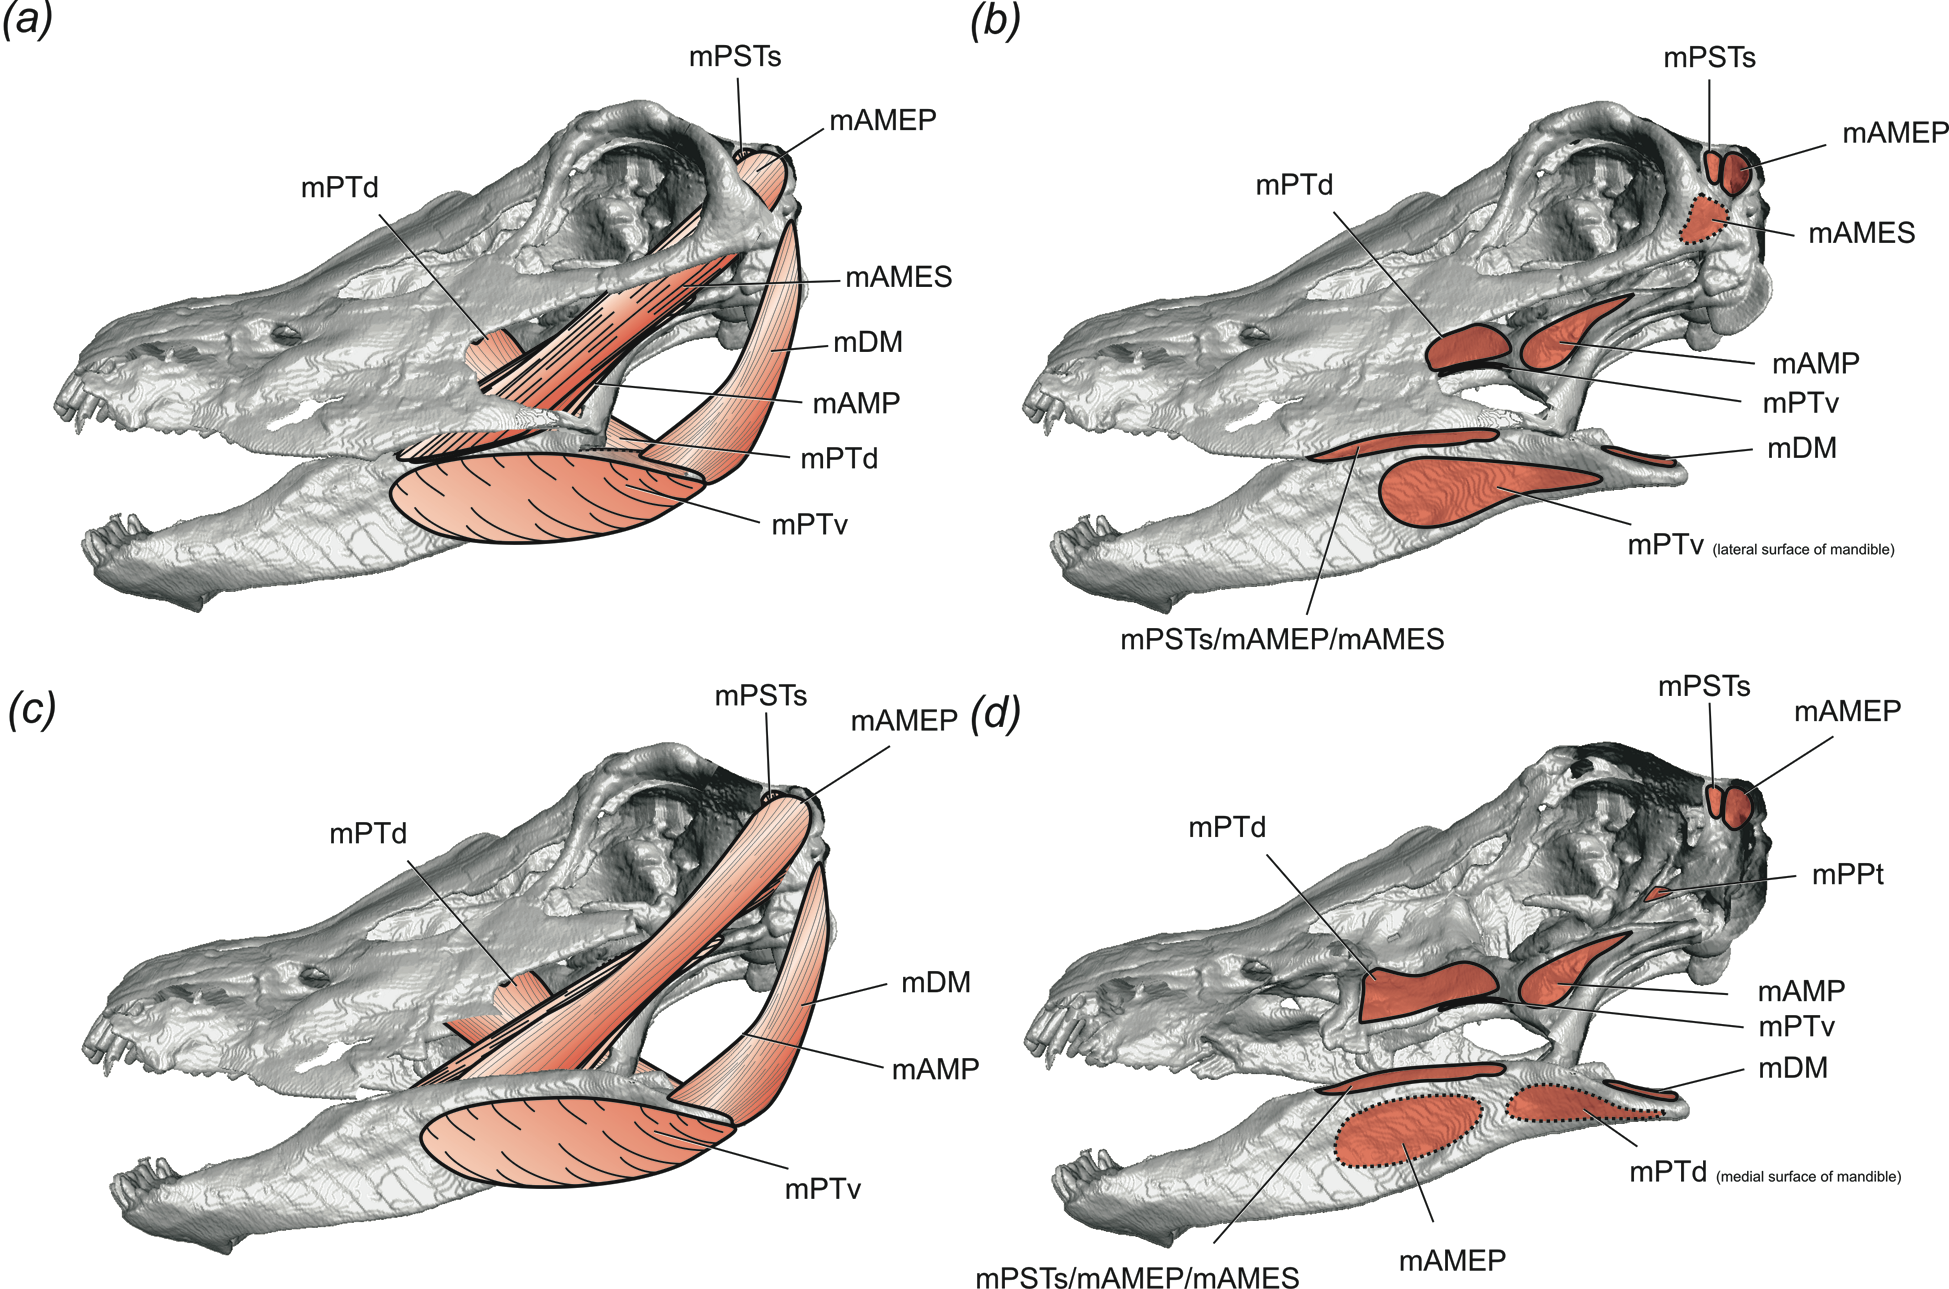


Reconstruction of six adductor muscles (figure S6) follows the methodology of Holliday (2009). The muscle attachment sites were mapped onto the 3D cranial surface model so that their surface areas could be calculated (using Strand7 FE-software). The volume of each muscle was calculated assuming its shape was a frustum. The muscle attachment sites served as the ends of the frustum, with its length determined to be the maximum distance between the two attachment sites.

Frustum Volume = L/3 (A1 + (square-root[A1A2]) + A2) Eq. 1

Where L = length of the frustum, A1 = area of the muscle origination site, A2 = area of the muscle insertion site.

The calculated muscle volume was used to estimate physiological cross-sectional area by using the maximum length of the muscle as the base fibre length. While it is unlikely this method will give the true fibre length, due to the adductor musculature having at least a small degree of pinnation, to minimise *ad hoc* assumptions the muscles were modelled without pinnation. Although the muscle contractile forces are equal to maximal cross-sectional area multiplied by specific tension (Wroe et al., 2005), one cannot determine the exact specific tension for fossil taxa. Here the physiological cross-sectional area was multiplied by the maximum known specific tension of vertebrate adductor muscles (392 kPa; see Thomason et al., 1990). These muscle forces assume 100% contraction (muscle force magnitudes are listed in Table S1). The muscle contractile forces were applied directly to the nodes of the FE-mesh and oriented in the line of action suggested by the reconstruction.

**Calculated muscle forces (Table S1)**

| Muscle contractile forces | |  |  | muscle volume (m3) | PCSA (m2) | Muscle force N | Muscle force N |
| --- | --- | --- | --- | --- | --- | --- | --- |
|  | Cranial attachment area (m2) | Mandibular attachment area (m2) | approximate length between attachments (m) | volume of a frustrum | muscle volume / fibre length | PCSA x specific tension lower (147 kPa) | PCSA x specific tension upper (392 kPa) |
| mAMEP | 1.30E-03 | 7.88E-04 | 0.256 | 2.65E-04 | 1.03E-03 | 152 | 405 |
| mPSTs | 9.06E-04 | 4.23E-04 | 0.2505 | 1.62E-04 | 6.48E-04 | 95 | 254 |
| mAMP | 3.22E-03 | 3.41E-03 | 0.0952 | 3.15E-04 | 3.31E-03 | 487 | 1299 |
| mPTd | 4.29E-03 | 2.69E-03 | 0.157 | 5.43E-04 | 3.46E-03 | 508 | 1355 |
| mPTv | 3.55E-04 | 3.20E-03 | 0.134 | 2.06E-04 | 1.54E-03 | 226 | 603 |
| mAMES | 1.06E-03 | 2.28E-03 | 0.1751 | 2.86E-04 | 1.63E-03 | 240 | 640 |

Abbreviations as before.

**Calculated branch and bark stripping forces (Table S2)**

|  | Branch-stripping | Bark-stripping |
| --- | --- | --- |
| Yield Stress (Nm-2) | 1.00E+06 | 7.30E+06 |
| Area of tooth-contact (m2) | 2.50E-05 | 2.50E-05 |
|  |  |  |
|  | Newtons | Newtons |
| 4 teeth | 100 | 730 |
| 8 teeth | 200 | 1460 |
| 14 teeth | 350 | 2555 |

**Reaction forces (N) at the craniomandibular joint (Table S3)**

| Model | Static bite | Branch-stripping | Bark-stripping |
| --- | --- | --- | --- |
| 4 teeth | 3147.02 | 3146.94 | 3168.39 |
| 8 teeth | 3147.01 | 3147.82 | 3239.43 |
| 14 teeth | 3147.00 | 3150.89 | 3431.79 |

**3) Additional images of the three *Diplodocus* feeding models**

**Figure S7. *Diplodocus longus* skull von Mises stress contour plots for the static biting model, in: A) lateral view, B) dorsal view, C) ventral view and D) frontal view.**


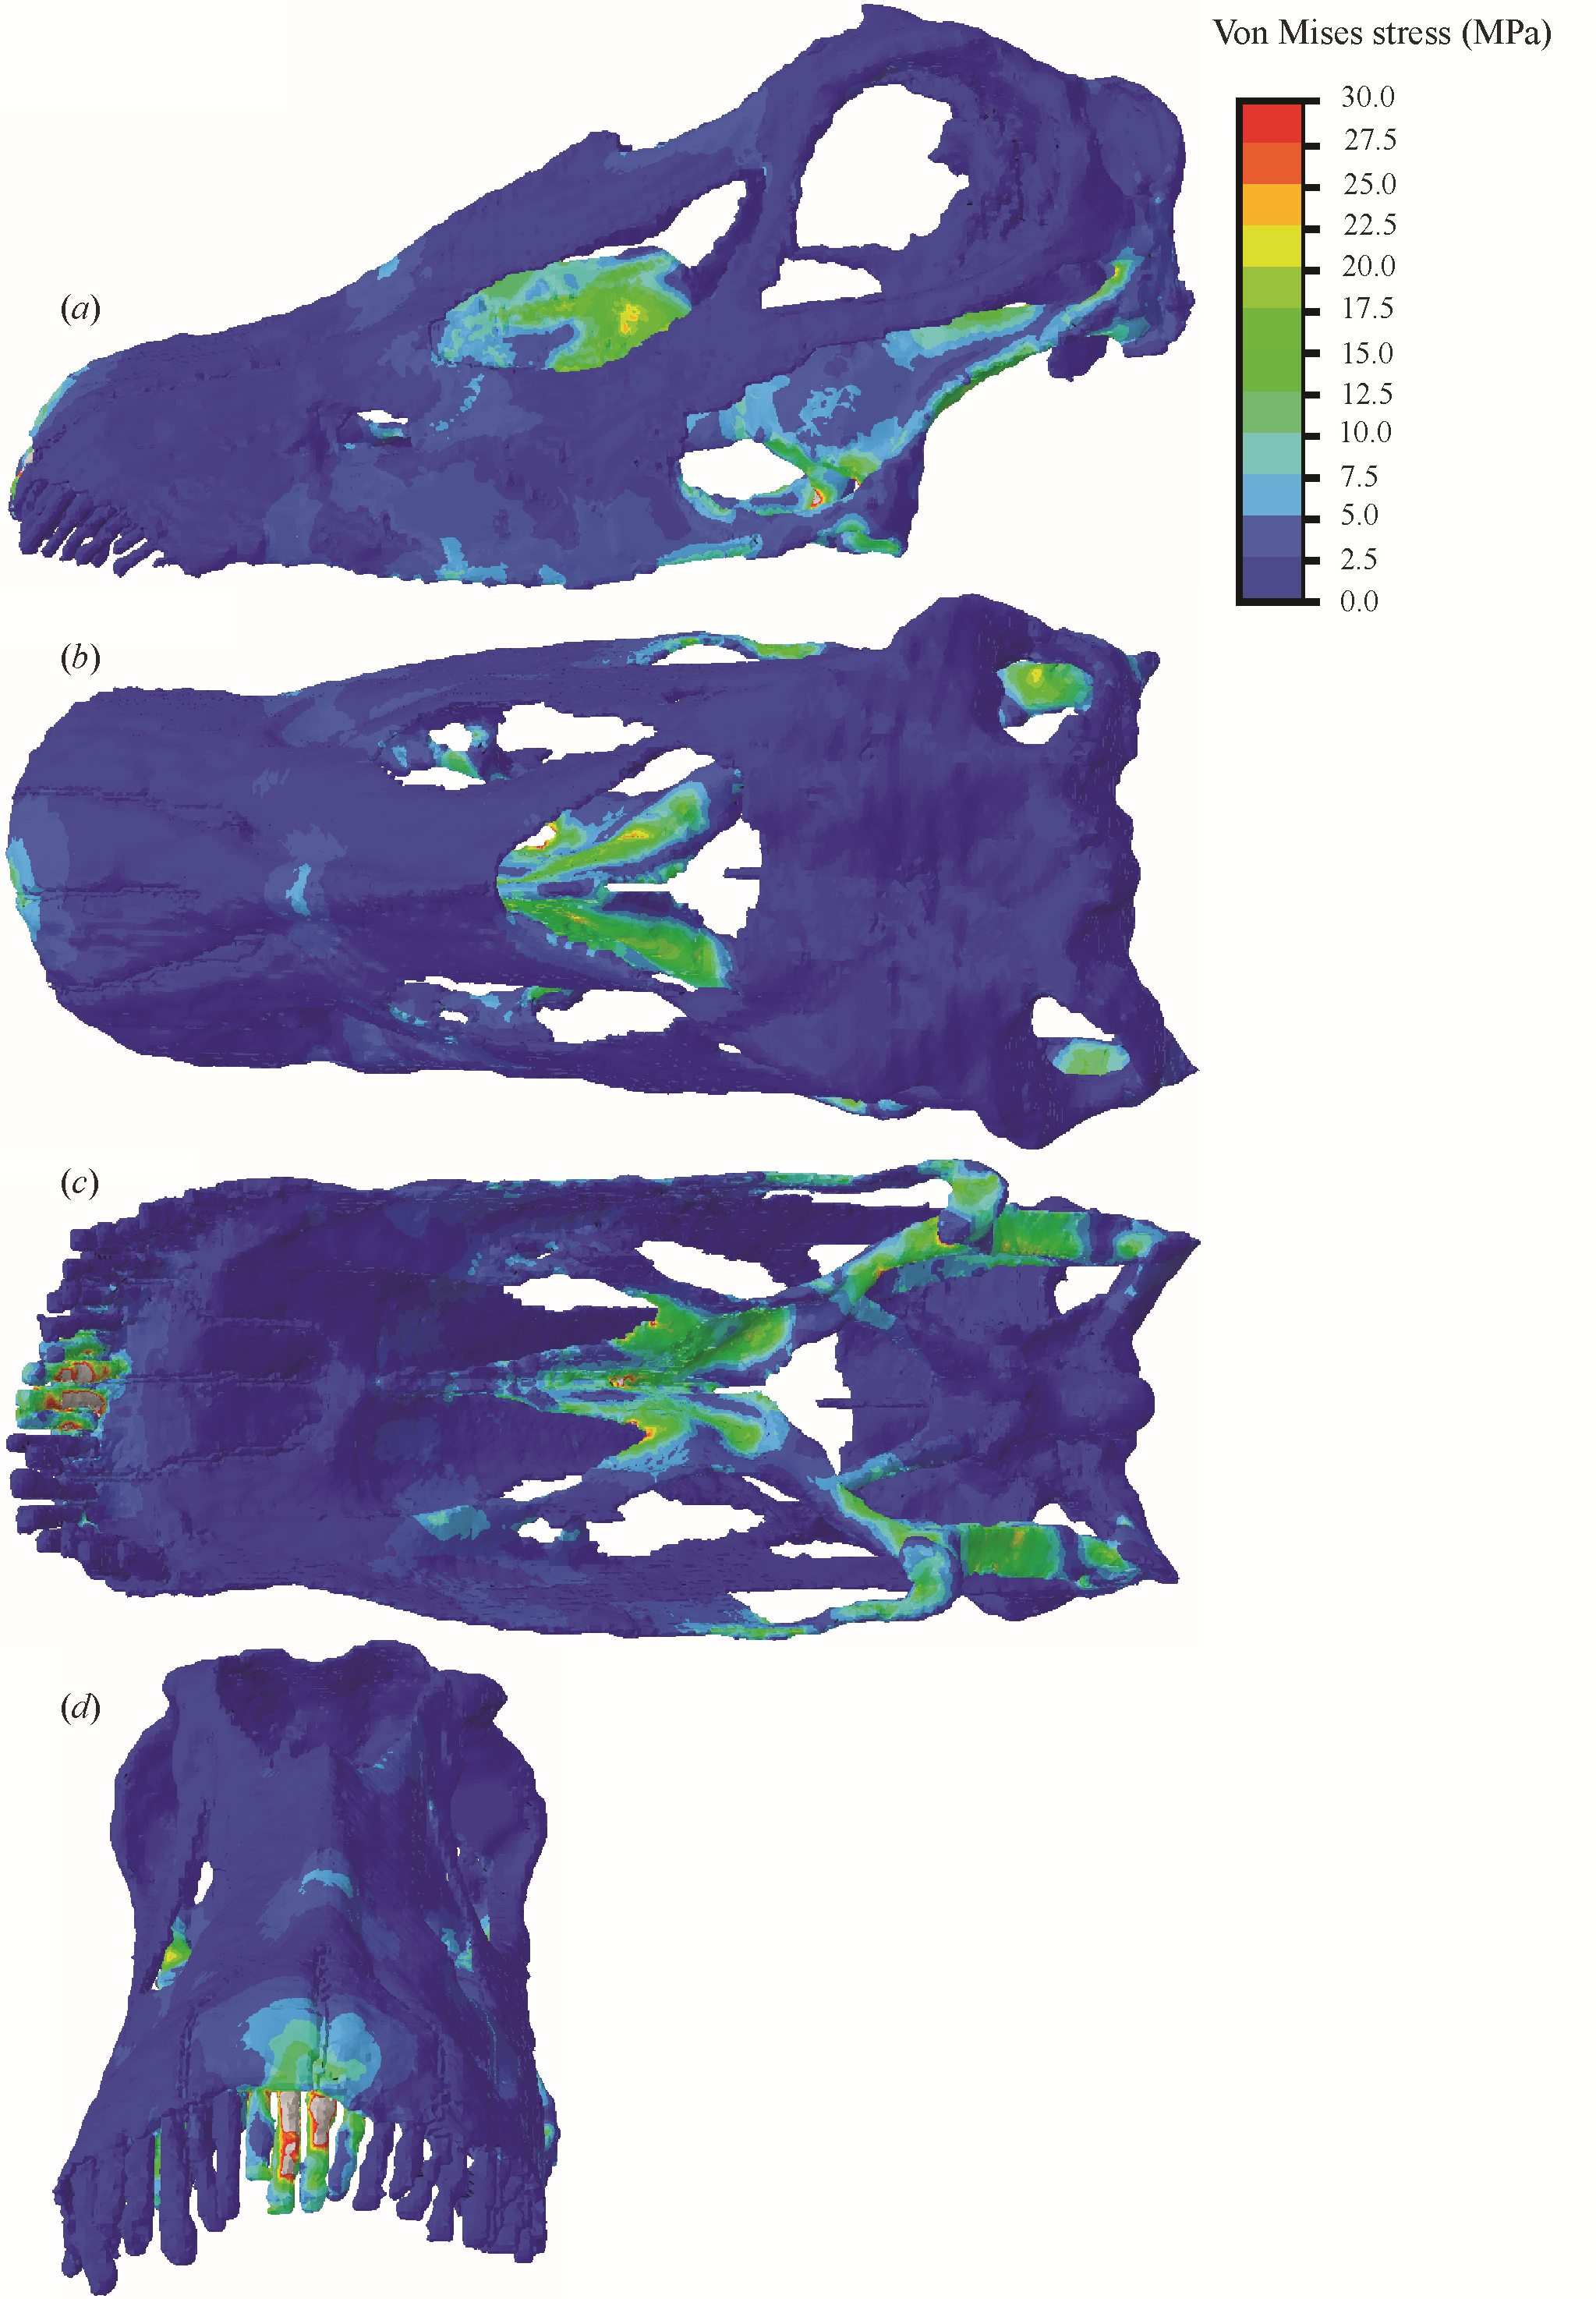


**Figure S8. *Diplodocus longus* skull von Mises stress contour plots for the branch stripping model, in: A) lateral view, B) dorsal view, C) ventral view and D) frontal view.**


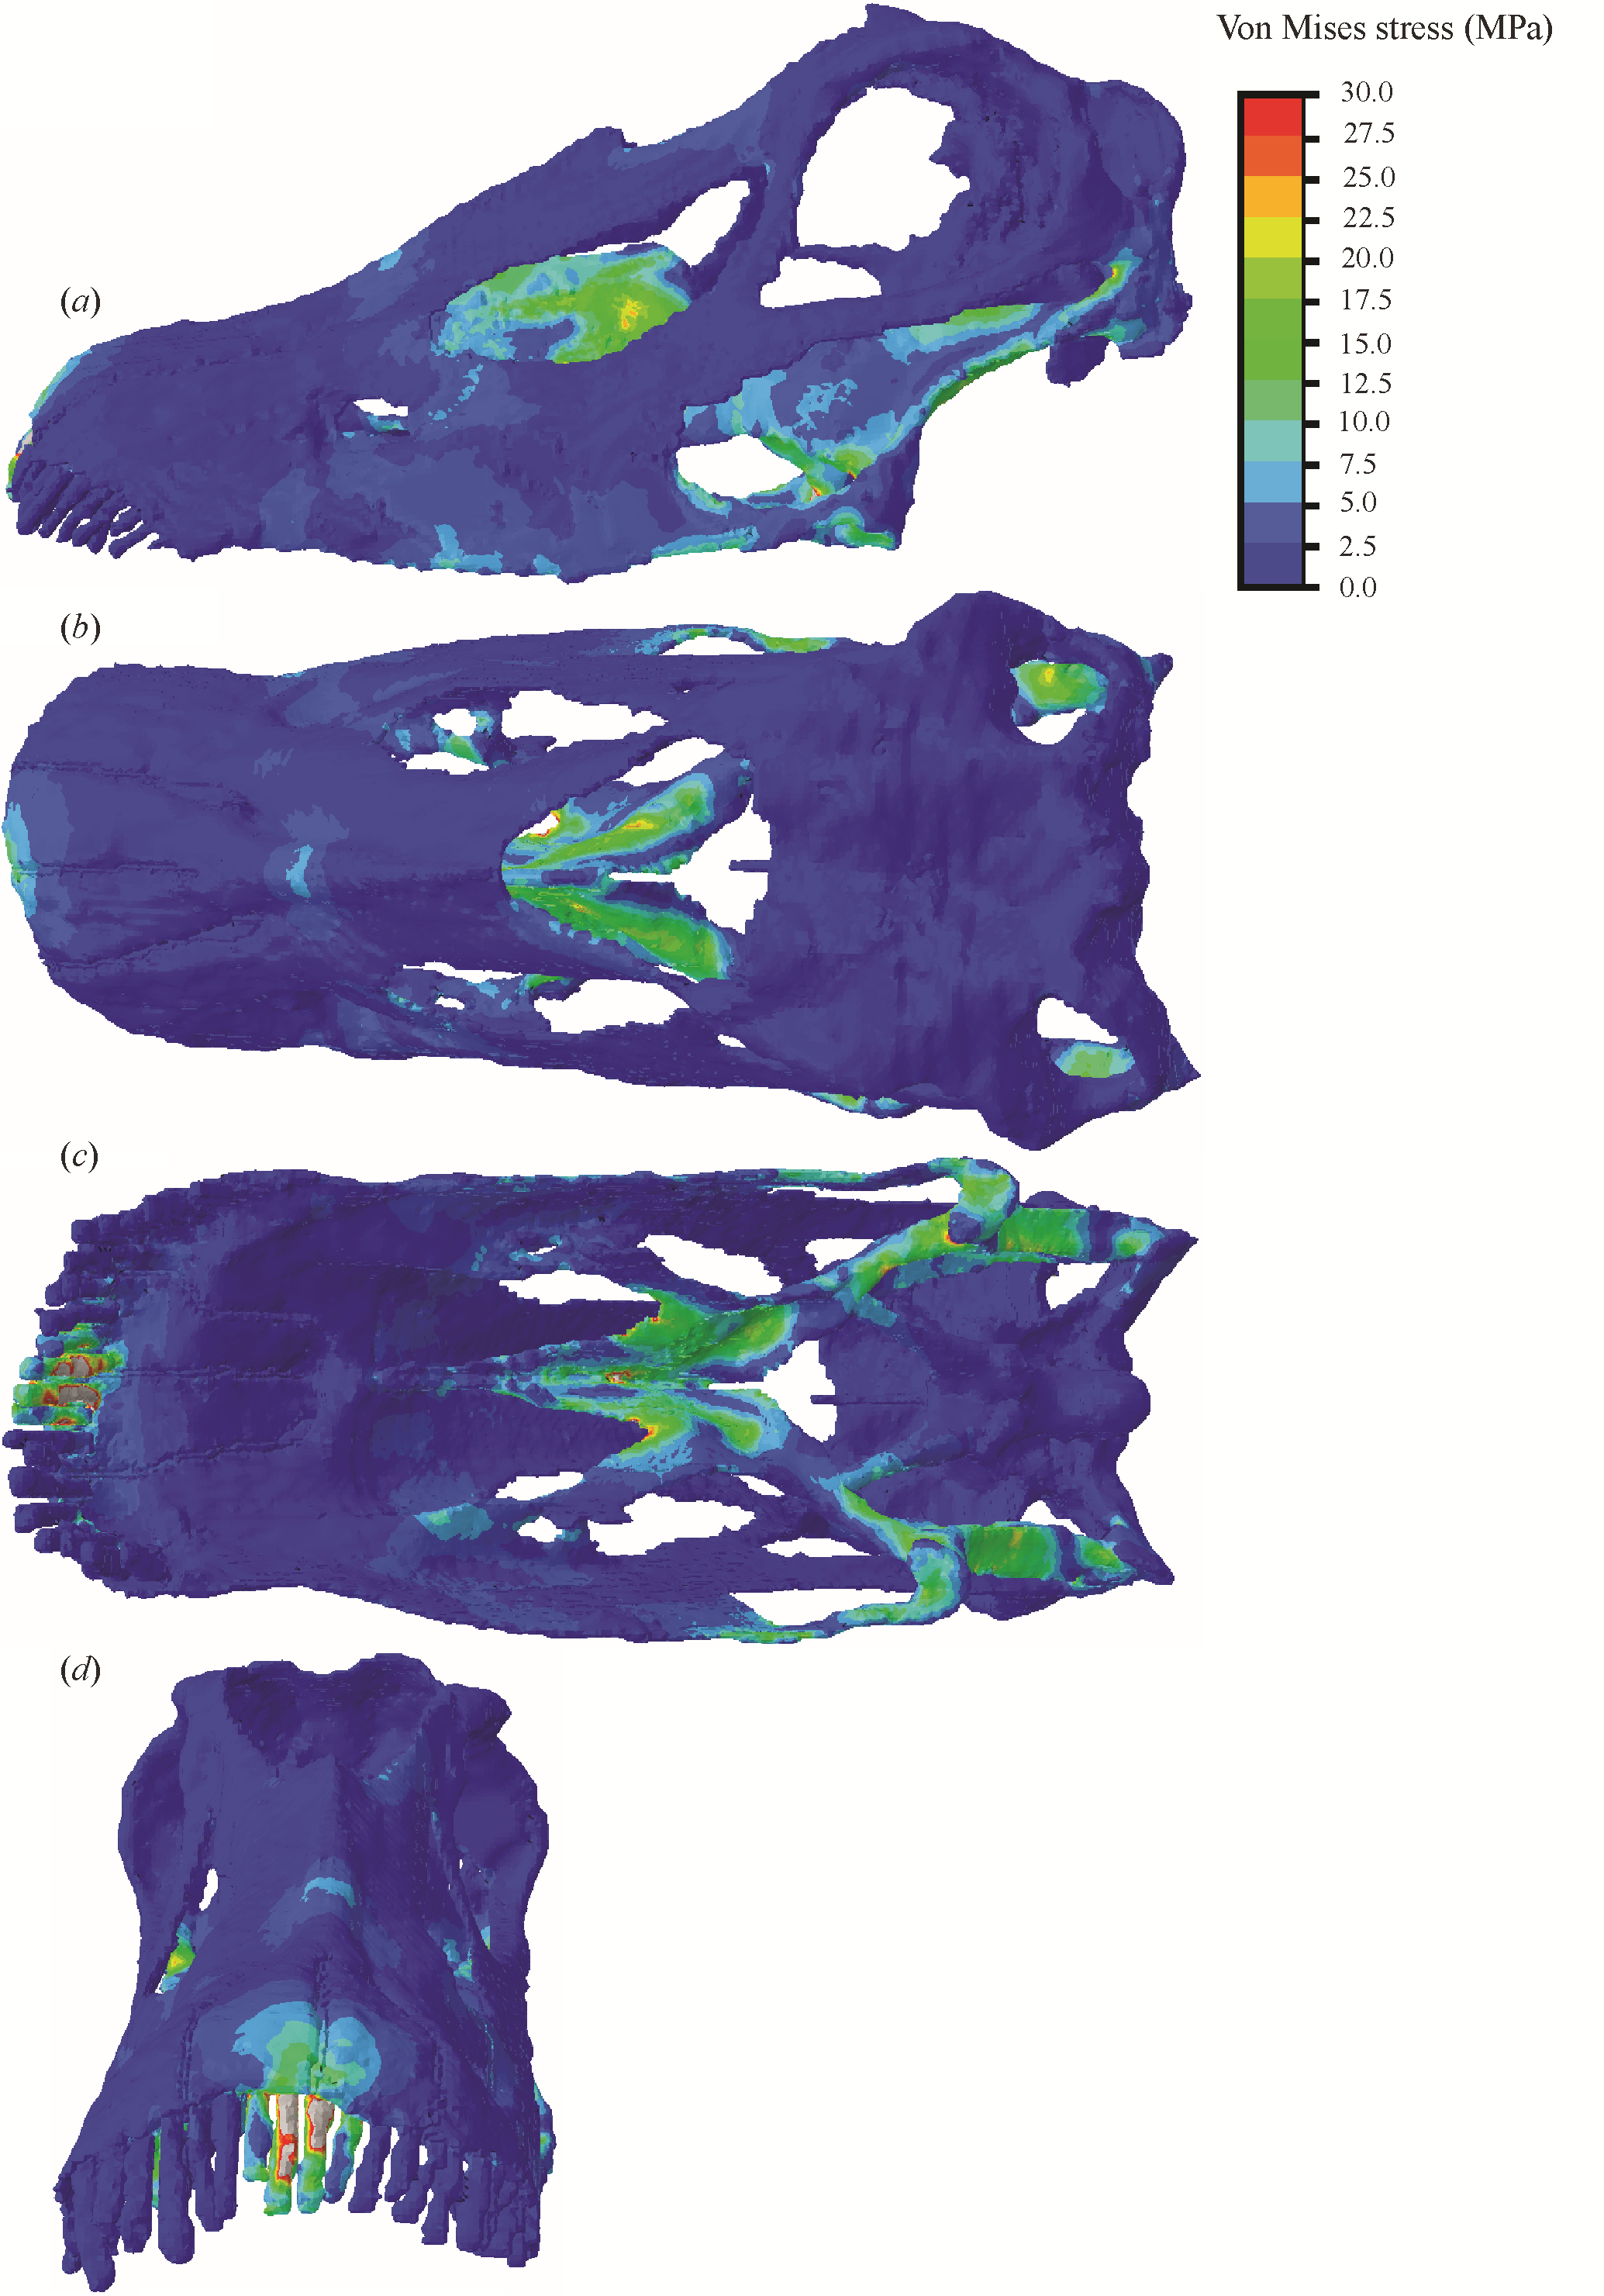


**Figure S9. *Diplodocus longus* skull von Mises stress contour plots for the bark stripping model, in: A) lateral view, B) dorsal view, C) ventral view and D) frontal view.**

**4) Exact locations of the 16 nodal loci**


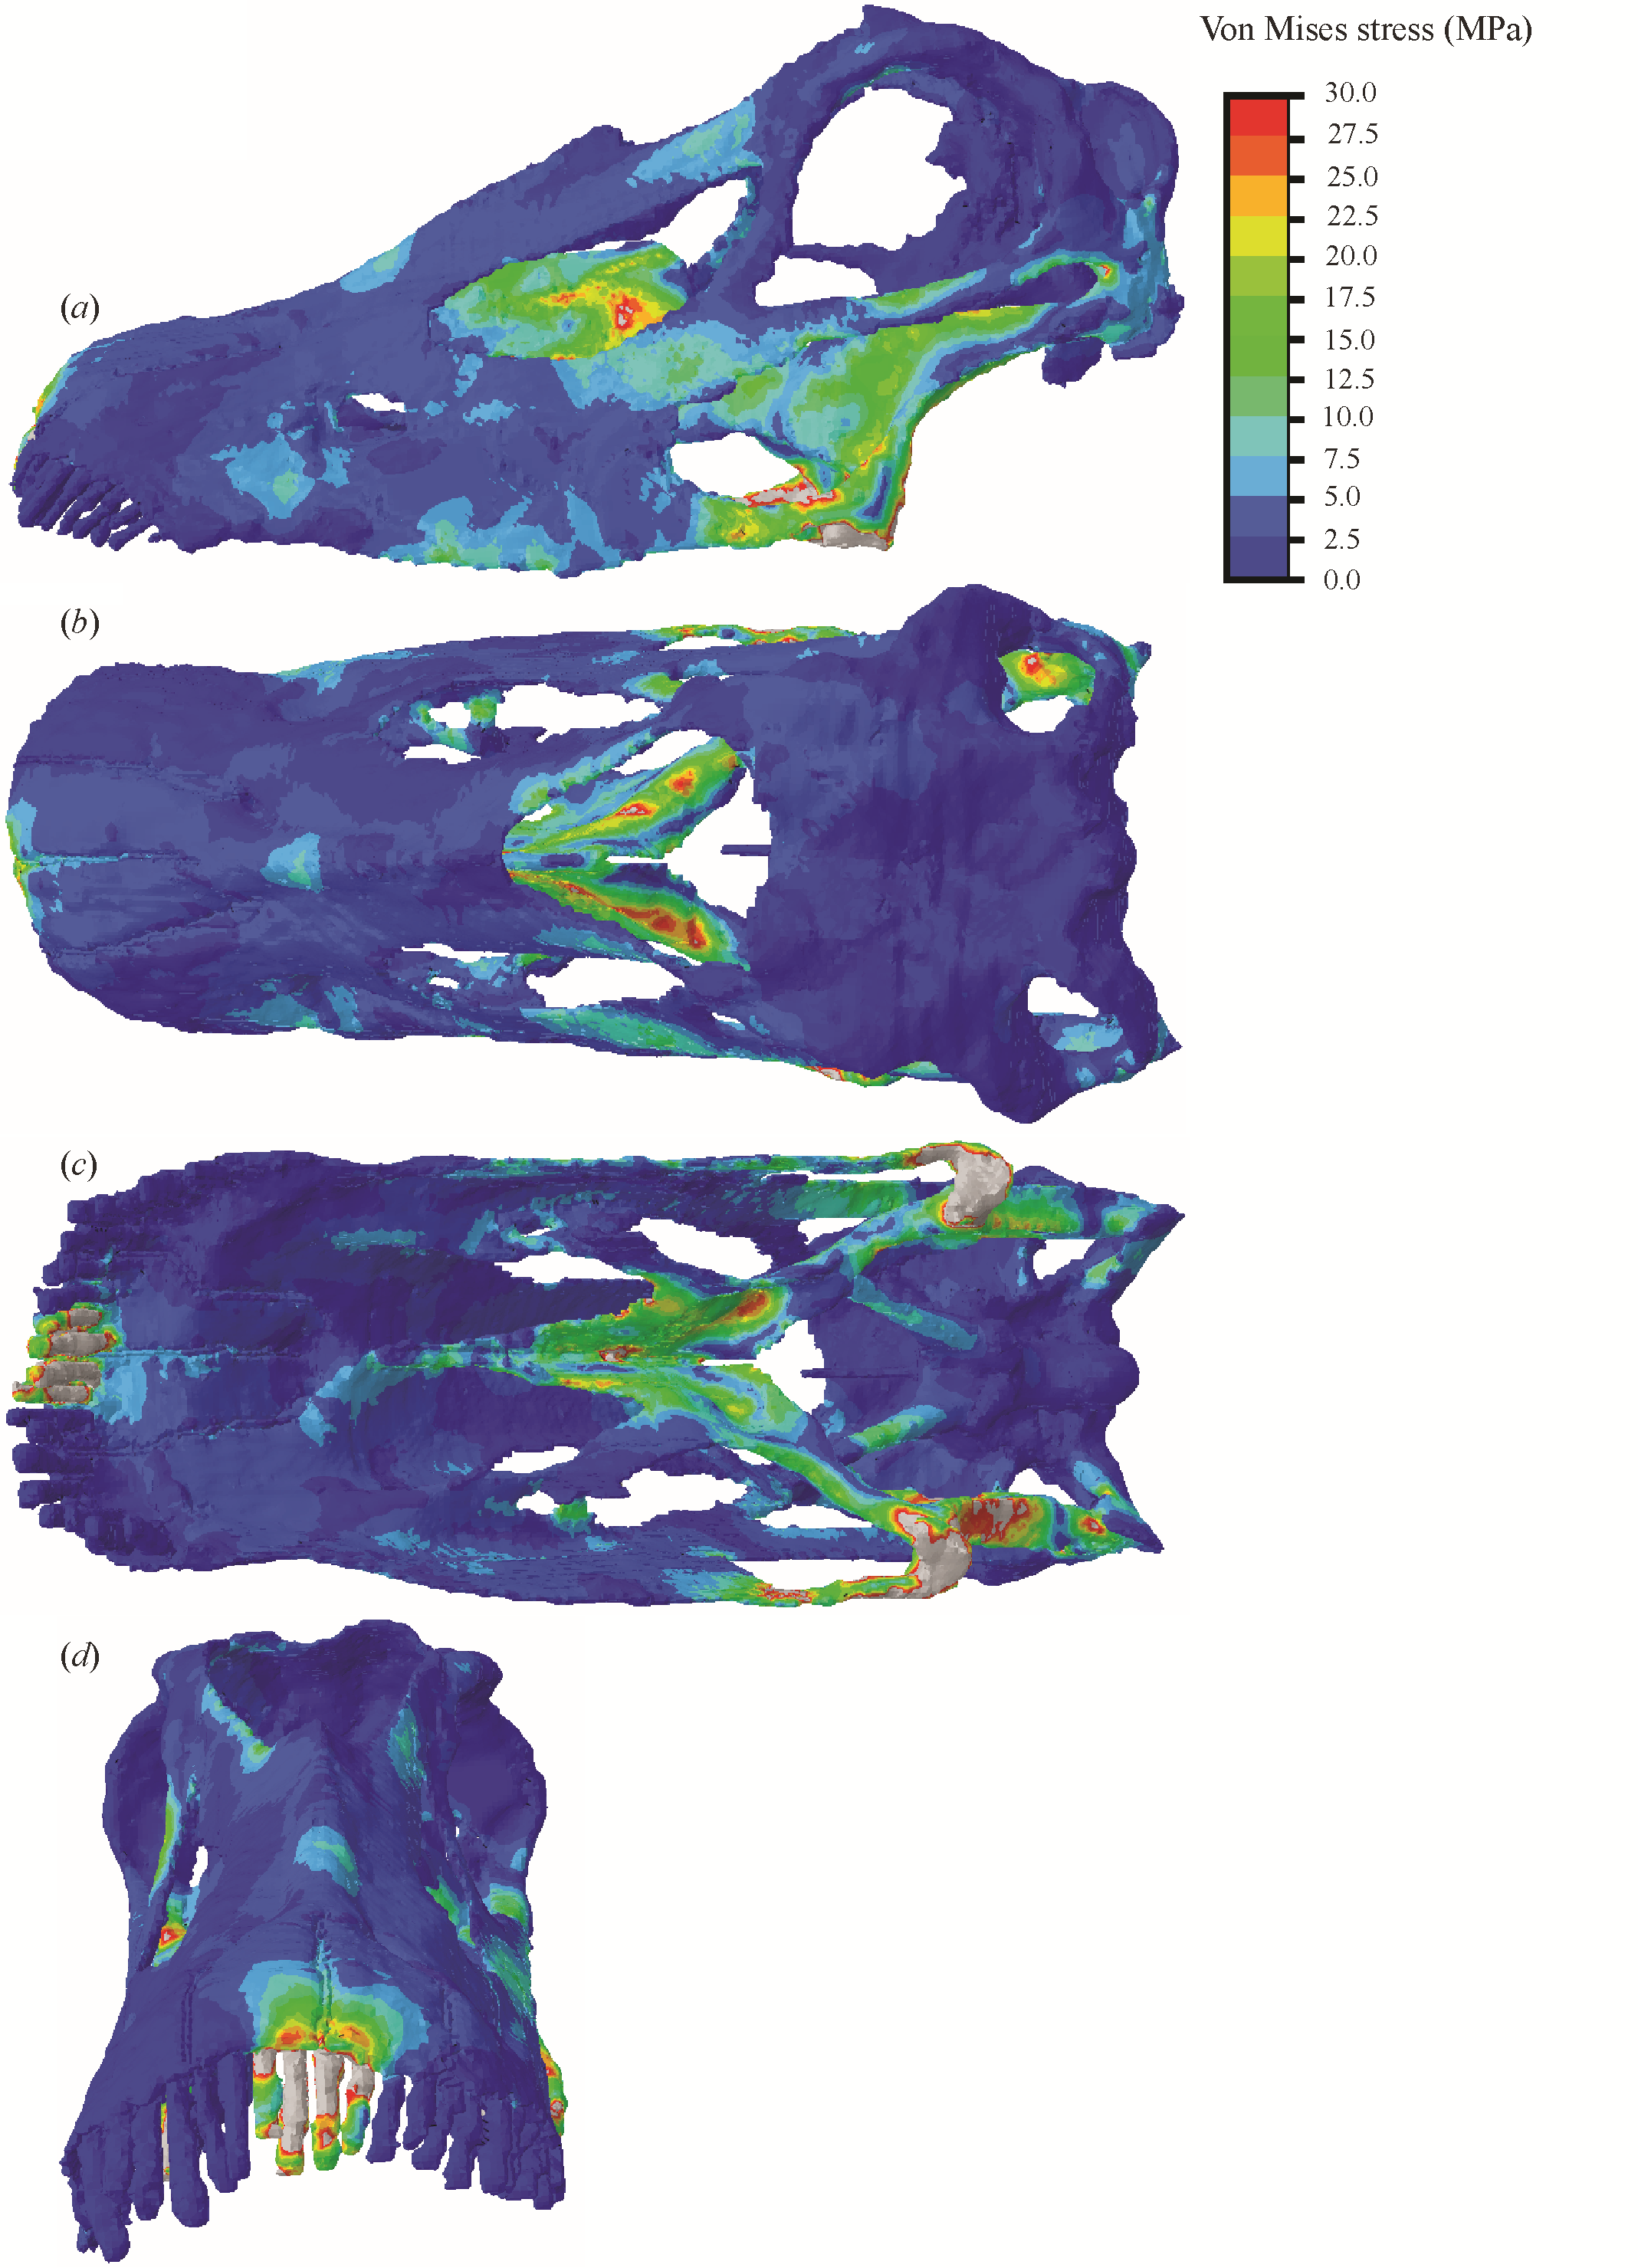


**Locations of the 16 nodal loci used in Figure 2 (Table S4)**

| Locus number | Anatomical location |
| --- | --- |
| 1 | suture between postorbital and squamosal within the infratemporal fenestra |
| 2 | midpoint along the dorsal margin of the quadratojugal, within the infratemporal fenestra |
| 3 | suture between maxilla and lacrimal within the antorbital fenestra |
| 4 | suture between premaxilla and maxilla within the external nares |
| 5 | suture between ectopterygoid and maxilla (ventral surface) |
| 6 | midpoint along the palatine midline (ventral surface) |
| 7 | suture between basipterygoid process and pterygoid (ventrocaudal surface) |
| 8 | suture between paroccipital process and quadrate (dorsocaudal surface) |
| 9 | inflexion point of the quadratojugal along the ventral margin |
| 10 | maxilla external surface immediately ventral to the preantorbital fenestra |
| 11 | premaxilla-premaxilla suture along the midline, at the point immediately caudal to where the dentigerous regions converge to form the ascending processes (external surface) |
| 12 | external surface of the parietal, at the midpoint along the midline |
| 13 | suture between maxilla and quadratojugal (lateral face of the skull, external surface) |
| 14 | midpoint of the quadratojugal beneath the infratemporal fenestra (lateral face of the skull, external surface) |
| 15 | premaxilla-premaxilla suture along midline of the dentigerous region (external surface) |
| 16 | distal region of the medial-most left premaxillary tooth (rostral surface) |

**5) Sensitivity analyses**

After our initial results, we subsequently tested how sensitive the results are to: 1) the number of teeth constrained/loaded and 2) the fact that we used the highest possible specific tension for the adductor muscles. In both tests the same FE-mesh was used, with the same methodology as before, but with specific differences.

The first sensitivity test involved two further iterations of the FE-analysis, altering the DCC to constrain not four teeth but, a) the 8 mesial-most teeth and b) the 14 mesial-most teeth. In addition, for the branch-stripping and bark-stripping models we also altered the loading regime to account for the additional teeth constrained (see Table S2). This resulted in six new FE-contour plots (static biting with 8 teeth constrained, static biting with 14 teeth constrained, branch-stripping with 8 teeth loaded and constrained, branch-stripping with 14 teeth loaded and constrained, bark-stripping with 8 teeth loaded and constrained, and bark-stripping with 14 teeth loaded and constrained).

These six new simulations, and the original three, are shown in figure S10. As can be seen, there is very little difference between the three static-biting simulations (figure S10A-C). All that is altered is the stress distribution in the constrained teeth and the adjacent dentigerous bone, i.e. when more teeth are constrained peak stress in the dentigerous region of the premaxilla lowers and becomes more widely distributed across the front of the snout, similarly the stress in the teeth decreases. This pattern is replicated in the four new stripping action models (figure S10E-F, H-I). These models all exhibit another pattern, a generalised increase in stress in the thinner regions of the skull (lateral portions of the maxillae and the ascending processes, quadratojugals, and jugals). In the branch-stripping models, the stress increase in these more fragile areas of the skull is negligible (figure S10D-F). However, in the bark-stripping models there is a more pronounced increase in cranial stress, particularly in these fragile areas (figure S10G-I). Interestingly, when 14 teeth are loaded and constrained for the bark-stripping model the entire premaxilla is stressed, as is the entire dentigerous region of both the premaxilla and maxilla, anterolateral margins of the external nares, and peaks of high stress accumulating at points along the skull ventral margin and the lower temporal bar (figure S10I). These additional simulations help to re-enforce how unlikely bark-stripping is as a potential feeding behaviour, and how even dramatically increasing the number of teeth being loaded does not make branch-stripping any less likely.

In the second test we reduced the specific tension of the adductor muscles (to 147 kP). The resultant change in adductor muscle forces that were applied to the models are in Table S1. All other variables were kept constant. As one would expect, the overall stress magnitudes are lower for all three models, but the patterns are the same. This is to be expected as the different muscle forces, although decreased in magnitude, are still proportionally the same.

**Figure S10. *Diplodocus longus* skull von Mises stress contour plots for the sensitivity analysis (tooth count variation). Contour plots A-C are the static-biting model, contour plots D-F are the branch-stripping model, and contour plots G-I are the bark stripping models. Contour plots (A), (D) and (G) have the 4 medial most teeth fixed (i.e., the default within this paper). Contour plots (B), (E) and (H) have the 8 medial most teeth fixed. Contour plots (C), (F) and (I) have the 14 medial most teeth fixed.**


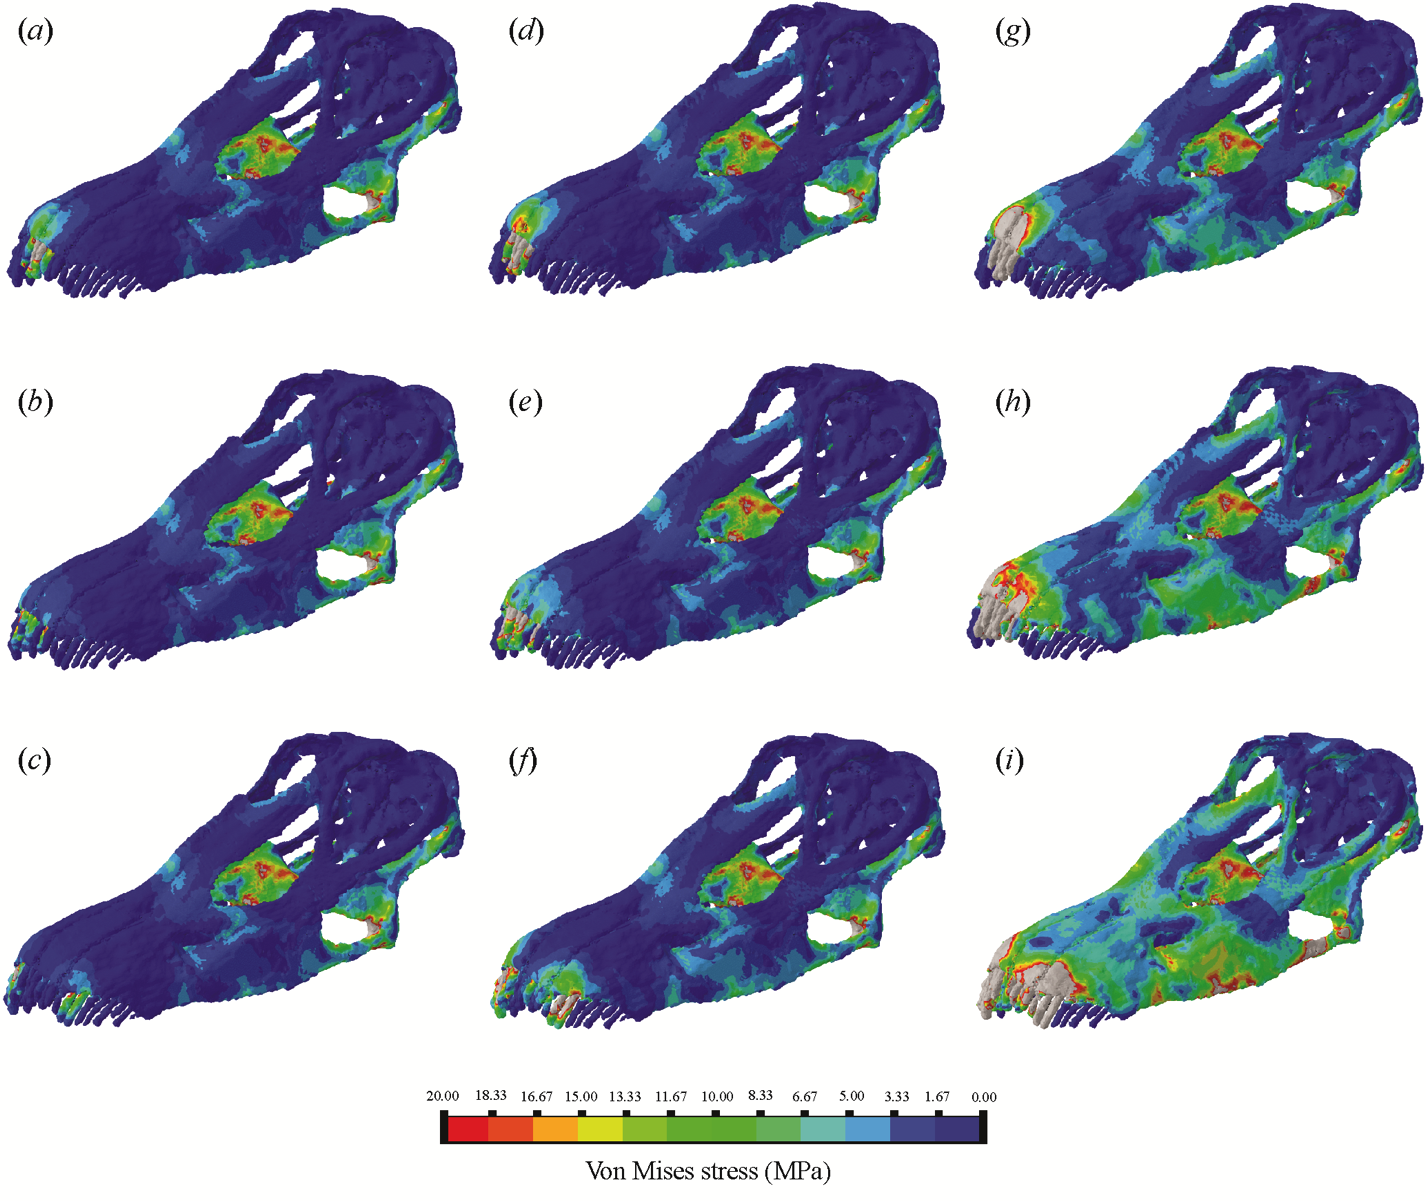


**6) Supplementary references**

References cited in this online supplement can be found either in the bibliography of the main article or, when not cited in the latter, in the supplementary reference list below.

Gilmore RS, Pollack RP, Katz JL (1969) Elastic properties of bovine dentine and enamel. Arch Oral Biol 15:787–796.

Ichim I, Schmidlin PR, Kieser JA, Swain MV (2007) Mechanical evaluation of cervical glass-ionomer restorations: 3D finite element study. J Dent 35:28–35.

Reilly D, Burstein A (1975) The elastic and ultimate properties of compact bone tissue. J Biomech 8:393–405.

Spears IR, van Noort R, Crompton RH, Cardew GE (1993) The effects of enamel anisotropy on the distribution of stress in a tooth. J Dent Res **72**:1526–1531.

Strait DS, Wang Q, Dechow PC, Ross CF, Richmond BG, Spencer MA, Patel BA (2005) Modeling elastic properties in finite element analysis: how much precision is needed to produce an accurate model? Anat Rec A283:275–287.

Thomason JJ, Russell AP, Morgeli M (1990) Forces of biting, body size, and masticatory muscle tension in the opossum *Didelphis virginiana*. Can J Zool 68:318–324.

Witmer LM, Ridgely RC, Dufeau DL, Semones M C (2008) Using CT to peer into the past: 3D visualization of the brain and ear regions of birds, crocodiles, and nonavian dinosaurs. In: Endo, H., Frey, R. (eds.) Anatomical Imaging: Towards a New Morphology. Springer-Verlag, pp. 67–88.

Wroe S, Clausen P, McHenry C, Moreno K, Thomason J. (2005) Computer simulation of feeding behavior in the thylacine and dingo as a novel test for convergence and niche overlap. Proc R Soc Lond B274:2819–2828.

Wroe S, McHenry C, Thomason J (2005) Bite club: comparative bite force in big biting mammals and the prediction of predatory behaviour in fossil taxa. Proc R Soc Lond B272:619–625.

Zapata U, Metzger K, Wang Q, Elsey RM, Ross C, Dechow PC (2010) Material properties of mandibular cortical bone in the American alligator, *Alligator* *mississippiensis*. Bone46:860–867.
